# Supplementary material for: Designing a Model for Non-communicable Diseases Management During Pandemics in Iran
Source: Research Square preprint supplement (doi:10.21203/rs.3.rs-8241448/v1), 2026-01-12
Supplement: Supplementary file 1 [file 4192c2a5fc3e3dcbefa1b271.pdf]

Supplementary File 1: English version of the questionnaire used to

**"Designing a Model of Factors Affecting on the Health Services Management of Chronic Non-Communicable Diseases in Pandemics for Iran"**

**Demographic Information:**

**Gender:** Female ☐ Male ☐

**Age:**.....

**Educational Qualification:**

Master's Degree ☐ Professional Doctorate (General / Specialist) ☐

PhD (Doctor of Philosophy) ☐

**Work Experience:**.....

| row | Item                                                                                                                                                                                                                 | Strongly Disagree | Disagree | Neither Agree nor Disagree | Agree | Strongly Agree |
|-----|----------------------------------------------------------------------------------------------------------------------------------------------------------------------------------------------------------------------|-------------------|----------|----------------------------|-------|----------------|
| 1   | The country's overarching national strategy comprehensively addresses the management of non-communicable diseases (NCDs) during public health crises (such as the COVID-19 pandemic).                                |                   |          |                            |       |                |
| 2   | The national strategy effectively introduces measures for managing public health crises (such as the COVID-19 pandemic) that ensure the continuity and safety of care for non-communicable diseases (NCDs).          |                   |          |                            |       |                |
| 3   | The national strategy has the capacity to rapidly adapt policies in response to emerging health threats while maintaining a focus on non-communicable diseases (NCDs).                                               |                   |          |                            |       |                |
| 4   | Communication and information exchange between various public and private sectors are essential for managing non-communicable diseases (NCDs) during public health crises (such as the COVID-19 pandemic).           |                   |          |                            |       |                |
| 5   | Policies and strategies for managing non-communicable diseases (NCDs) are well-coordinated across different levels of public and private sectors during recent public health crises (such as the COVID-19 pandemic). |                   |          |                            |       |                |
| 6   | Intersectoral collaboration at the governmental level leads to timely and effective responses in managing non-communicable diseases (NCDs) during recent public health crises (such as the COVID-19 pandemic).       |                   |          |                            |       |                |
| 7   | Health system leaders are capable of offering effective and immediate solutions for the efficient management of non-communicable diseases (NCDs) during public health crises (such as the COVID-19 pandemic).        |                   |          |                            |       |                |
| 8   | During public health crises (such as the COVID-19 pandemic), rapid and effective policymaking is undertaken by the country's health governance structures to address non-communicable diseases (NCDs).               |                   |          |                            |       |                |

| row | Item                                                                                                                                                                                                                                               | Strongly Disagree | Disagree | Neither Agree nor Disagree | Agree | Strongly Agree |
|-----|----------------------------------------------------------------------------------------------------------------------------------------------------------------------------------------------------------------------------------------------------|-------------------|----------|----------------------------|-------|----------------|
| 9   | The country's health system is able to demonstrate the necessary resilience during public health crises (such as the COVID-19 pandemic).                                                                                                           |                   |          |                            |       |                |
| 10  | In the country, sufficient financial resources are provided to deliver services to patients with non-communicable diseases (NCDs) during public health crises (such as the COVID-19 pandemic).                                                     |                   |          |                            |       |                |
| 11  | The budgets allocated for managing non-communicable diseases (NCDs) during public health crises (such as the COVID-19 pandemic) enable the provision of essential healthcare services.                                                             |                   |          |                            |       |                |
| 12  | The level of financial resources during public health crises (such as the COVID-19 pandemic) is allocated in proportion to patient demand and health system infrastructure.                                                                        |                   |          |                            |       |                |
| 13  | Adequate financial resources are made available for training and supporting the health workforce involved in managing non-communicable diseases (NCDs) during public health crises (such as the COVID-19 pandemic).                                |                   |          |                            |       |                |
| 14  | In the allocation of financial resources within the health system, sufficient funding is designated for managing non-communicable diseases (NCDs) during public health crises (such as the COVID-19 pandemic).                                     |                   |          |                            |       |                |
| 15  | The allocation of financial resources among different diseases within the country's health system is carried out fairly to support the management of non-communicable diseases (NCDs) during public health crises (such as the COVID-19 pandemic). |                   |          |                            |       |                |
| 16  | The priorities for allocating financial resources for managing non-communicable diseases (NCDs) during public health crises (such as the COVID-19 pandemic) are regularly reviewed and updated.                                                    |                   |          |                            |       |                |
| 17  | The budget allocated for managing non-communicable diseases (NCDs) during public health crises (such as the COVID-19 pandemic) is distributed effectively.                                                                                         |                   |          |                            |       |                |
| 18  | The allocation of financial resources within the country's health system for managing non-communicable diseases (NCDs) during public health crises (such as the COVID-19 pandemic) is carried out based on health and treatment priorities.        |                   |          |                            |       |                |
| 19  | The management of financial resources within the country's health system during public health crises (such as the COVID-19 pandemic) is conducted in a way that enhances the efficiency and effectiveness of health services.                      |                   |          |                            |       |                |
| 20  | An adequate number of health workers is provided for managing non-communicable diseases (NCDs) during public health crises (such as the COVID-19 pandemic).                                                                                        |                   |          |                            |       |                |

| row | Item                                                                                                                                                                                                                                 | Strongly Disagree | Disagree | Neither Agree nor Disagree | Agree | Strongly Agree |
|-----|--------------------------------------------------------------------------------------------------------------------------------------------------------------------------------------------------------------------------------------|-------------------|----------|----------------------------|-------|----------------|
| 21  | The health workforce responsible for managing non-communicable diseases (NCDs) during public health crises (such as the COVID-19 pandemic) is distributed effectively.                                                               |                   |          |                            |       |                |
| 22  | The distribution of the health workforce during public health crises (such as the COVID-19 pandemic) ensures that all patients with non-communicable diseases (NCDs) have access to services.                                        |                   |          |                            |       |                |
| 23  | The health workforce involved in caring for patients with non-communicable diseases (NCDs) during public health crises (such as the COVID-19 pandemic) is distributed equally and fairly throughout the health system.               |                   |          |                            |       |                |
| 24  | The country's health workforce has sufficient skills to provide the necessary care to patients with non-communicable diseases (NCDs) during public health crises (such as the COVID-19 pandemic).                                    |                   |          |                            |       |                |
| 25  | The country's health workforce is capable of implementing new and updated protocols for managing non-communicable diseases (NCDs) during public health crises (such as the COVID-19 pandemic).                                       |                   |          |                            |       |                |
| 26  | The country's health workforce can effectively communicate with patients with non-communicable diseases (NCDs) during public health crises (such as the COVID-19 pandemic) and understand their needs.                               |                   |          |                            |       |                |
| 27  | The country's health workforce is able to cope with the workload pressures arising from managing non-communicable diseases (NCDs) during public health crises (such as the COVID-19 pandemic).                                       |                   |          |                            |       |                |
| 28  | The country's health workforce has sufficient organizational support to address the challenges of managing non-communicable diseases (NCDs) during public health crises (such as the COVID-19 pandemic).                             |                   |          |                            |       |                |
| 29  | The country's health workforce possesses adequate psychological resilience to cope with stressful conditions in managing patients with non-communicable diseases (NCDs) during public health crises (such as the COVID-19 pandemic). |                   |          |                            |       |                |
| 30  | The country's health workforce demonstrates good flexibility when facing changes and work-related challenges during public health crises (such as the COVID-19 pandemic).                                                            |                   |          |                            |       |                |
| 31  | The country's health workforce can maintain an appropriate work-life balance during public health crises (such as the COVID-19 pandemic).                                                                                            |                   |          |                            |       |                |
| 32  | The country's health workforce has access to sufficient welfare resources to preserve their well-being during public health crises (such as the COVID-19 pandemic).                                                                  |                   |          |                            |       |                |

| row | Item                                                                                                                                                                                                                                              | Strongly Disagree | Disagree | Neither Agree nor Disagree | Agree | Strongly Agree |
|-----|---------------------------------------------------------------------------------------------------------------------------------------------------------------------------------------------------------------------------------------------------|-------------------|----------|----------------------------|-------|----------------|
| 33  | Medical products, drugs, and technologies needed by patients with non-communicable diseases (NCDs) during public health crises (such as the COVID-19 pandemic) are supplied in a timely manner.                                                   |                   |          |                            |       |                |
| 34  | Access to essential medical products, drugs, and technologies for patients with non-communicable diseases (NCDs) during public health crises (such as the COVID-19 pandemic) is adequately ensured.                                               |                   |          |                            |       |                |
| 35  | The distribution and delivery of medical products and drugs required by patients with non-communicable diseases (NCDs) during public health crises (such as the COVID-19 pandemic) are carried out effectively.                                   |                   |          |                            |       |                |
| 36  | The quality of drugs and medical products used for patients with non-communicable diseases (NCDs) during public health crises (such as the COVID-19 pandemic) is appropriate.                                                                     |                   |          |                            |       |                |
| 37  | Necessary measures are taken to ensure the safety of drugs and medical products for patients with non-communicable diseases (NCDs) during public health crises (such as the COVID-19 pandemic).                                                   |                   |          |                            |       |                |
| 38  | Quality control of medical products and drugs during public health crises (such as the COVID-19 pandemic) is adequately performed to manage patients with non-communicable diseases (NCDs).                                                       |                   |          |                            |       |                |
| 39  | Ensuring the safety of drugs and medical technologies used for patients with non-communicable diseases (NCDs) during public health crises (such as the COVID-19 pandemic) is prioritized.                                                         |                   |          |                            |       |                |
| 40  | Regulatory processes for approving new drugs and technologies during public health crises (such as the COVID-19 pandemic) are conducted efficiently.                                                                                              |                   |          |                            |       |                |
| 41  | The country's regulatory system is transparent and robust to ensure the safety and effectiveness of drugs and medical technologies used in managing non-communicable diseases (NCDs) during public health crises (such as the COVID-19 pandemic). |                   |          |                            |       |                |
| 42  | Regulatory mechanisms for ensuring compliance with safety standards in the production and use of drugs and medical technologies function effectively.                                                                                             |                   |          |                            |       |                |
| 43  | Integration of public health crisis data (such as COVID-19) with non-communicable disease (NCD) management systems accelerates and coordinates the overall response to both public health crises and NCDs.                                        |                   |          |                            |       |                |
| 44  | The country's integrated health data system is capable of monitoring and responding to the needs of patients with non-communicable diseases (NCDs) during public health crises (such as the COVID-19 pandemic).                                   |                   |          |                            |       |                |

| row | Item                                                                                                                                                                                                                | Strongly Disagree | Disagree | Neither Agree nor Disagree | Agree | Strongly Agree |
|-----|---------------------------------------------------------------------------------------------------------------------------------------------------------------------------------------------------------------------|-------------------|----------|----------------------------|-------|----------------|
| 45  | The integrated data system supports timely decision-making for managing both public health crises (such as COVID-19) and non-communicable diseases (NCDs).                                                          |                   |          |                            |       |                |
| 46  | Data related to non-communicable diseases (NCDs) are collected in a timely manner during public health crises (such as the COVID-19 pandemic).                                                                      |                   |          |                            |       |                |
| 47  | Data related to non-communicable diseases (NCDs) are easily accessible to staff and managers during public health crises (such as the COVID-19 pandemic).                                                           |                   |          |                            |       |                |
| 48  | During public health crises (such as the COVID-19 pandemic), data related to non-communicable diseases (NCDs) can be easily shared across different sectors of the health system.                                   |                   |          |                            |       |                |
| 49  | The country's health information system provides high-quality and accurate data on non-communicable diseases (NCDs) during public health crises (such as the COVID-19 pandemic).                                    |                   |          |                            |       |                |
| 50  | Telehealth services improve the quality of care for patients with non-communicable diseases (NCDs) during public health crises (such as the COVID-19 pandemic).                                                     |                   |          |                            |       |                |
| 51  | Digital health technologies enhance patients' access to necessary health services for non-communicable diseases (NCDs) during public health crises (such as the COVID-19 pandemic).                                 |                   |          |                            |       |                |
| 52  | The use of digital health technologies improves communication between patients with non-communicable diseases (NCDs) and healthcare staff during public health crises (such as the COVID-19 pandemic)/              |                   |          |                            |       |                |
| 53  | The health system implements appropriate security protocols for storing and transferring health data of patients with non-communicable diseases (NCDs) during public health crises (such as the COVID-19 pandemic). |                   |          |                            |       |                |
| 54  | The country's health system has appropriate policies and procedures for reporting and managing breaches of patient health data privacy and security.                                                                |                   |          |                            |       |                |
| 55  | Electronic systems for managing health data of patients with non-communicable diseases (NCDs) have robust mechanisms to prevent unauthorized access and breaches.                                                   |                   |          |                            |       |                |
| 56  | Required healthcare services for patients with non-communicable diseases (NCDs) are continuously available during public health crises (such as the COVID-19 pandemic).                                             |                   |          |                            |       |                |
| 57  | Emergency services needed by patients with non-communicable diseases (NCDs) are easily accessible during public health crises (such as the COVID-19 pandemic).                                                      |                   |          |                            |       |                |

| row | Item                                                                                                                                                                                                                | Strongly Disagree | Disagree | Neither Agree nor Disagree | Agree | Strongly Agree |
|-----|---------------------------------------------------------------------------------------------------------------------------------------------------------------------------------------------------------------------|-------------------|----------|----------------------------|-------|----------------|
| 58  | The delivery of healthcare services required by patients with non-communicable diseases (NCDs) is continuous and integrated during public health crises (such as the COVID-19 pandemic).                            |                   |          |                            |       |                |
| 59  | Healthcare specialists required for patients with non-communicable diseases (NCDs) are available when needed during public health crises (such as the COVID-19 pandemic).                                           |                   |          |                            |       |                |
| 60  | During public health crises (such as the COVID-19 pandemic), all patients with non-communicable diseases (NCDs) receive healthcare services without discrimination.                                                 |                   |          |                            |       |                |
| 61  | Health system staff provide healthcare services fairly to all patients during public health crises (such as the COVID-19 pandemic), regardless of their economic status.                                            |                   |          |                            |       |                |
| 62  | There is no racial or ethnic discrimination in access to healthcare services for patients with non-communicable diseases (NCDs) during public health crises (such as the COVID-19 pandemic).                        |                   |          |                            |       |                |
| 63  | During public health crises (such as the COVID-19 pandemic), all patients with non-communicable diseases (NCDs) receive healthcare services of comparable quality.                                                  |                   |          |                            |       |                |
| 64  | There is no gender-based discrimination in providing services to patients with non-communicable diseases (NCDs) during the COVID-19 pandemic.                                                                       |                   |          |                            |       |                |
| 65  | The delivery of services to patients with non-communicable diseases (NCDs) during public health crises (such as the COVID-19 pandemic) is provided equitably, regardless of their place of residence (urban/rural). |                   |          |                            |       |                |
